# Supplementary material for: Specific serum and CSF microRNA profiles distinguish sporadic behavioural variant of frontotemporal dementia compared with Alzheimer patients and cognitively healthy controls
Source: PLoS One. 2018 May 10;13(5):e0197329. doi: 10.1371/journal.pone.0197329 (PMC5945001; doi:10.1371/journal.pone.0197329)
Supplement: S1 Table — Listed is the FOC (number of positive miRNAs), arithmetic mean of raw Cq values of each subgroup and the standard deviation, the miRBase accession and the miRNA sequence. bvFTD = behavioural variant frontotemporal dementia, Cq = quantification cycle, FOC = frequency of occurrence, HC = cognitively healthy controls, SD = standard deviation. (XLSX) [file pone.0197329.s006.xlsx]

## Sheet: S1 Table
miRNA	CSF			serum			miRBase accession	sequence
	FOC	Cq mean	Cq SD	FOC	Cq mean	Cq SD
let-7a-5p | HC	44	33.3123	1.18746	CSF panel only			MIMAT0000062	UGAGGUAGUAGGUUGUAUAGUU
let-7a-5p | bvFTD	48	33.1123	1.49165
let-7a-5p | AD	47	32.6887	1.41903
let-7b-5p | HC	29	34.7003	1.56341	38	30.6768	1.89551	MIMAT0000063	UGAGGUAGUAGGUUGUGUGGUU
let-7b-5p | bvFTD	38	34.4929	1.80176	47	28.7285	1.3926
let-7b-5p | AD	36	33.9492	2.07799	46	28.6089	1.77213
let-7c-5p | HC	43	34.8442	1.07722	37	32.9349	1.42222	MIMAT0000064	UGAGGUAGUAGGUUGUAUGGUU
let-7c-5p | bvFTD	45	33.6549	1.42897	47	31.8413	1.32875
let-7c-5p | AD	44	33.4209	1.74366	46	31.6761	1.23264
let-7d-5p | HC	15	36.226	0.663226	38	29.7739	1.48506	MIMAT0000065	AGAGGUAGUAGGUUGCAUAGUU
let-7d-5p | bvFTD	19	35.92	0.674693	47	28.5551	1.19151
let-7d-5p | AD	19	35.7874	0.862573	46	28.3878	1.37087
let-7e-5p | HC	25	35.9116	0.749376	38	32.2774	1.16026	MIMAT0000066	UGAGGUAGGAGGUUGUAUAGUU
let-7e-5p | bvFTD	37	35.5135	0.899312	47	31.4772	1.1689
let-7e-5p | AD	34	35.46	0.960451	46	31.41	1.10773
let-7f-5p | HC	40	35.2283	0.890041	38	29.3389	1.51612	MIMAT0000067	UGAGGUAGUAGAUUGUAUAGUU
let-7f-5p | bvFTD	45	34.8924	0.927198	47	27.9379	1.21762
let-7f-5p | AD	47	34.6313	0.983226	46	27.7741	1.34114
let-7g-5p | HC	40	34.6562	1.05287	38	28.6934	1.47183	MIMAT0000414	UGAGGUAGUAGUUUGUACAGUU
let-7g-5p | bvFTD	45	34.6027	0.8895	47	26.6077	0.908829
let-7g-5p | AD	43	34.3123	1.40314	46	26.2593	1.29661
let-7i-5p | HC	41	34.7927	1.52493	38	27.7316	1.445	MIMAT0000415	UGAGGUAGUAGUUUGUGCUGUU
let-7i-5p | bvFTD	44	34.3666	1.51424	47	26.6323	0.815345
let-7i-5p | AD	42	34.2055	1.65457	46	26.3248	1.06203
miR-100-5p | HC	44	31.4909	1.1328	38	32.2171	1.30405	MIMAT0000098	AACCCGUAGAUCCGAACUUGUG
miR-100-5p | bvFTD	47	31.1445	1.13815	47	31.6421	0.809458
miR-100-5p | AD	47	30.9202	1.41162	46	31.3057	1.06465
miR-101-3p | HC	44	30.9345	1.28699	38	26.4921	1.50734	MIMAT0000099	UACAGUACUGUGAUAACUGAA
miR-101-3p | bvFTD	48	31.0165	1.47373	47	24.8006	0.968595
miR-101-3p | AD	48	30.7092	1.4706	46	24.5167	0.972239
miR-103a-3p | HC	41	34.2666	1.58094	38	26.7634	1.36921	MIMAT0000101	AGCAGCAUUGUACAGGGCUAUGA
miR-103a-3p | bvFTD	48	33.7823	1.31979	47	25.0598	1.08622
miR-103a-3p | AD	47	33.4972	1.43844	46	24.5533	1.33194
miR-106a-5p | HC	31	34.6832	2.24802	38	27.0766	1.53789	MIMAT0000103	AAAAGUGCUUACAGUGCAGGUAG
miR-106a-5p | bvFTD	37	34.3359	1.56911	47	25.0964	0.701422
miR-106a-5p | AD	43	34.2598	1.96968	46	24.737	1.20948
miR-106b-5p | HC	12	34.7308	3.96494	38	30.3413	1.33566	MIMAT0000680	UAAAGUGCUGACAGUGCAGAU
miR-106b-5p | bvFTD	13	35.1162	2.01311	47	28.2532	0.878977
miR-106b-5p | AD	19	35.5595	1.3194	46	27.7976	1.28588
miR-107 | HC	9	36.0567	0.848749	CSF panel only			MIMAT0000104	AGCAGCAUUGUACAGGGCUAUCA
miR-107 | bvFTD	18	36.1561	0.64069
miR-107 | AD	15	35.7907	1.15261
miR-124-3p | HC	42	34.074	1.01241	CSF panel only			MIMAT0000422	UAAGGCACGCGGUGAAUGCC
miR-124-3p | bvFTD	46	33.1476	1.17651
miR-124-3p | AD	42	32.7964	0.947968
miR-1246 | HC	38	34.3434	1.46622	38	29.1547	1.35126	MIMAT0005898	AAUGGAUUUUUGGAGCAGG
miR-1246 | bvFTD	40	34.9818	0.987561	47	28.6647	1.11601
miR-1246 | AD	43	34.7323	1.18303	46	29.1657	1.1436
miR-125a-5p | HC	44	33.5495	1.1049	38	29.4268	1.27053	MIMAT0000443	UCCCUGAGACCCUUUAACCUGUGA
miR-125a-5p | bvFTD	46	32.647	1.53286	47	27.9417	0.836676
miR-125a-5p | AD	47	32.0253	1.55602	46	27.9248	1.07765
miR-125b-5p | HC	44	29.9368	1.31041	38	30.8768	1.30878	MIMAT0000423	UCCCUGAGACCCUAACUUGUGA
miR-125b-5p | bvFTD	48	29.2892	1.50773	47	29.2666	0.686384
miR-125b-5p | AD	47	28.9523	1.57574	46	29.0061	1.0608
miR-126-3p | HC	20	32.995	5.29077	38	25.4945	1.22558	MIMAT0000445	UCGUACCGUGAGUAAUAAUGCG
miR-126-3p | bvFTD	29	33.4269	4.47883	47	23.9564	0.83969
miR-126-3p | AD	30	34.1387	3.48876	46	23.7074	0.95242
miR-1274a | HC	10	36.244	0.662608	CSF panel only			fragment of a Lys tRNA
miR-1274a | bvFTD	7	36.5971	0.414838
miR-1274a | AD	10	36.468	0.332091
miR-1274b | HC	44	27.3956	1.02246	CSF panel only			fragment of a Lys tRNA
miR-1274b | bvFTD	48	27.2598	0.713446
miR-1274b | AD	48	26.9383	1.05514
miR-128-3p | HC	24	35.8871	0.776903	37	32.1132	1.43407	MIMAT0000424	UCACAGUGAACCGGUCUCUUU
miR-128-3p | bvFTD	36	35.3464	1.80956	47	31.1574	1.04574
miR-128-3p | AD	36	35.1478	1.48879	46	30.953	1.19272
miR-132-3p | HC	34	34.8159	2.34648	38	31.3047	1.46348	MIMAT0000426	UAACAGUCUACAGCCAUGGUCG
miR-132-3p | bvFTD	39	34.5492	3.39847	47	30.5128	0.59608
miR-132-3p | AD	45	34.2218	2.38592	46	30.4933	0.814052
miR-140-3p | HC	41	34.1393	1.67773	38	26.4621	1.39762	MIMAT0004597	UACCACAGGGUAGAACCACGG
miR-140-3p | bvFTD	45	34.0404	1.73431	47	25.5657	0.564261
miR-140-3p | AD	45	32.8598	1.59685	46	25.3861	0.93426
miR-142-3p | HC	43	33.7981	1.08632	38	26.3232	1.46508	MIMAT0000434	UGUAGUGUUUCCUACUUUAUGGA
miR-142-3p | bvFTD	46	33.5709	0.907967	47	24.4862	1.27329
miR-142-3p | AD	48	33.1242	1.40323	46	24.2411	1.21799
miR-143-3p | HC	41	32.3605	1.50724	38	31.1655	2.00297	MIMAT0000435	UGAGAUGAAGCACUGUAGCUC
miR-143-3p | bvFTD	47	31.6902	1.50996	47	29.1389	1.08392
miR-143-3p | AD	45	31.6371	1.62457	46	29.2802	1.40265
miR-145-5p | HC	43	32.6337	1.43189	CSF panel only			MIMAT0000437	GUCCAGUUUUCCCAGGAAUCCCU
miR-145-5p | bvFTD	46	32.4983	1.43273
miR-145-5p | AD	44	31.9939	1.42482
miR-146a-5p | HC	39	34.5705	1.3341	38	27.5987	1.35732	MIMAT0000449	UGAGAACUGAAUUCCAUGGGUU
miR-146a-5p | bvFTD	44	34.7595	1.16626	47	27.1521	0.921459
miR-146a-5p | AD	42	34.4217	1.27161	46	27.0667	1.07516
miR-148a-3p | HC	25	35.6652	1.19709	38	30.6405	1.70925	MIMAT0000243	UCAGUGCACUACAGAACUUUGU
miR-148a-3p | bvFTD	32	35.6397	1.25685	47	29.54	1.17188
miR-148a-3p | AD	28	35.4336	1.40266	46	29.6109	1.28559
miR-148b-3p | HC	40	34.5697	1.44926	38	28.4521	1.5314	MIMAT0000759	UCAGUGCAUCACAGAACUUUGU
miR-148b-3p | bvFTD	42	34.4426	2.37811	47	27.5219	1.15206
miR-148b-3p | AD	42	34.7507	1.71821	46	27.2204	1.13796
miR-150-5p | HC	44	33.6911	1.49306	37	27.7486	1.35514	MIMAT0000451	UCUCCCAACCCUUGUACCAGUG
miR-150-5p | bvFTD	48	33.4196	1.28797	47	26.233	0.86402
miR-150-5p | AD	48	32.5475	1.61013	46	26.1283	0.799965
miR-15a-5p | HC	42	32.9519	1.62158	38	25.7284	1.42839	MIMAT0000068	UAGCAGCACAUAAUGGUUUGUG
miR-15a-5p | bvFTD	43	33.3321	1.53256	47	25.2196	1.11295
miR-15a-5p | AD	44	33.1023	2.00391	46	24.922	1.13355
miR-15b-3p | HC	serum panel only			38	32.0632	1.52086	MIMAT0004586	CGAAUCAUUAUUUGCUGCUCUA
miR-15b-3p | bvFTD				47	30.5511	0.779178
miR-15b-3p | AD				46	30.2735	1.003
miR-15b-5p | HC	serum panel only			35	32.5591	2.15156	MIMAT0000417	UAGCAGCACAUCAUGGUUUACA
miR-15b-5p | bvFTD				46	30.702	1.99246
miR-15b-5p | AD				45	31.1542	2.06981
miR-16-5p | HC	44	31.0532	2.43083	38	20.5721	1.56897	MIMAT0000069	UAGCAGCACGUAAAUAUUGGCG
miR-16-5p | bvFTD	47	31.2221	2.19227	47	19.6994	0.759566
miR-16-5p | AD	47	30.5128	2.51536	46	19.4559	1.05441
miR-17-5p | HC	1	27.78	na	CSF panel only			MIMAT0000070	CAAAGUGCUUACAGUGCAGGUAG
miR-17-5p | bvFTD	0	na	na
miR-17-5p | AD	2	35.705	1.61927
miR-181a-5p | HC	26	35.3488	1.70716	37	30.2946	1.60399	MIMAT0000256	AACAUUCAACGCUGUCGGUGAGU
miR-181a-5p | bvFTD	36	35.3719	1.06993	47	28.7051	0.906438
miR-181a-5p | AD	41	34.4685	2.86016	45	28.4709	1.14037
miR-18a-5p | HC	5	35.854	1.09038	18	35.1256	1.26269	MIMAT0000258	AACAUUCAACCUGUCGGUGAGU
miR-18a-5p | bvFTD	6	35.2183	1.11573	43	34.5056	0.975669
miR-18a-5p | AD	10	35.181	1.94924	41	34.6205	1.13058
miR-18b-5p | HC	serum panel only			38	30.1745	1.55942	MIMAT0001412	UAAGGUGCAUCUAGUGCAGUUAG
miR-18b-5p | bvFTD				47	27.9102	0.876315
miR-18b-5p | AD				46	27.5396	1.32585
miR-191-5p | HC	19	35.6816	1.00016	38	28.1342	1.35232	MIMAT0000440	CAACGGAAUCCCAAAAGCAGCUG
miR-191-5p | bvFTD	26	35.59	0.860614	47	26.5943	0.760668
miR-191-5p | AD	29	35.1834	1.33605	46	26.4354	1.27217
miR-194-5p | HC	13	34.3946	4.93652	CSF panel only			MIMAT0000460	UGUAACAGCAACUCCAUGUGGA
miR-194-5p | bvFTD	16	33.44	4.75843
miR-194-5p | AD	24	34.4392	3.43616
miR-1915-3p | HC	serum panel only			0	na	na	MIMAT0007892	CCCCAGGGCGACGCGGCGGG
miR-1915-3p | bvFTD				0	na	na
miR-1915-3p | AD				0	na	na
miR-1915-5p | HC	serum panel only			14	36.2521	0.66995	MIMAT0007891	ACCUUGCCUUGCUGCCCGGGCC
miR-1915-5p | bvFTD				18	36.4083	0.432098
miR-1915-5p | AD				12	36.565	0.353463
miR-197-3p | HC	35	34.5431	2.44632	38	30.1218	1.65831	MIMAT0000227	UUCACCACCUUCUCCACCCAGC
miR-197-3p | bvFTD	41	34.5237	1.8668	47	27.7649	0.828482
miR-197-3p | AD	44	34.1052	1.81725	46	28.0937	1.27374
miR-19b-3p | HC	44	31.6261	2.16362	38	23.6063	1.42932	MIMAT0000074	UGUGCAAAUCCAUGCAAAACUGA
miR-19b-3p | bvFTD	48	31.5004	2.04499	47	22.3657	1.3498
miR-19b-3p | AD	46	30.9746	2.30401	46	21.8676	1.10023
miR-204-5p | HC	44	27.2041	0.904067	CSF panel only			MIMAT0000265	UUCCCUUUGUCAUCCUAUGCCU
miR-204-5p | bvFTD	48	26.7065	0.901428
miR-204-5p | AD	48	26.5823	0.703164
miR-20a-5p | HC	40	34.1517	2.04675	38	25.7426	1.71061	MIMAT0000075	UAAAGUGCUUAUAGUGCAGGUAG
miR-20a-5p | bvFTD	48	33.5398	1.83148	47	23.7994	0.780959
miR-20a-5p | AD	47	33.2434	2.18481	46	23.4722	1.22144
miR-21-5p | HC	43	27.1807	1.26539	38	23.4805	1.25641	MIMAT0000076	UAGCUUAUCAGACUGAUGUUGA
miR-21-5p | bvFTD	48	27.5742	1.43532	47	22.5389	0.588237
miR-21-5p | AD	46	27.2604	1.08258	46	22.387	0.866433
miR-22-3p | HC	40	34.6415	1.38595	38	26.9768	1.10921	MIMAT0000077	AAGCUGCCAGUUGAAGAACUGU
miR-22-3p | bvFTD	45	34.6687	1.60107	47	27.1087	1.10315
miR-22-3p | AD	45	33.536	1.38771	46	26.7889	1.03302
miR-222-3p | HC	43	33.5177	1.42409	38	27.595	1.2394	MIMAT0000279	AGCUACAUCUGGCUACUGGGU
miR-222-3p | bvFTD	44	33.4039	1.31598	47	26.6938	0.768238
miR-222-3p | AD	46	33.1502	1.38507	46	26.6637	0.876679
miR-223-3p | HC	40	33.54	1.74696	38	23.5118	1.89806	MIMAT0000280	UGUCAGUUUGUCAAAUACCCCA
miR-223-3p | bvFTD	46	32.8513	1.56833	46	20.4526	0.940644
miR-223-3p | AD	46	32.1404	2.00697	46	20.8767	1.54816
miR-23a-3p | HC	43	29.7695	1.24546	38	24.8618	1.31733	MIMAT0000078	AUCACAUUGCCAGGGAUUUCC
miR-23a-3p | bvFTD	48	29.6335	1.51022	47	23.4394	0.728084
miR-23a-3p | AD	47	29.2911	1.53091	46	23.4615	1.06222
miR-23b-3p | HC	44	32.1675	1.17312	38	26.9763	1.31721	MIMAT0000418	AUCACAUUGCCAGGGAUUACC
miR-23b-3p | bvFTD	47	31.7104	1.39494	46	25.3748	0.782988
miR-23b-3p | AD	48	31.2396	2.22816	46	25.4035	1.09007
miR-24-3p | HC	44	32.5245	1.42635	38	25.0187	1.41723	MIMAT0000080	UGGCUCAGUUCAGCAGGAACAG
miR-24-3p | bvFTD	47	32.2338	1.61608	47	23.8628	0.767893
miR-24-3p | AD	48	31.3533	1.94866	46	23.8887	1.10465
miR-25-3p | HC	34	34.9262	2.07713	38	25.9129	1.4934	MIMAT0000081	CAUUGCACUUGUCUCGGUCUGA
miR-25-3p | bvFTD	44	34.57	1.7741	47	24.6268	0.576157
miR-25-3p | AD	43	34.1377	2.04441	46	24.4609	1.05809
miR-26a-5p | HC	26	35.7608	0.79616	38	30.265	1.62372	MIMAT0000082	UUCAAGUAAUCCAGGAUAGGCU
miR-26a-5p | bvFTD	30	35.39	0.784114	47	28.0438	1.13873
miR-26a-5p | AD	30	35.079	1.10715	45	27.8198	1.32727
miR-26b-5p | HC	4	36.0075	0.887595	36	33.0836	1.77035	MIMAT0000083	UUCAAGUAAUUCAGGAUAGGU
miR-26b-5p | bvFTD	10	36.293	0.61132	47	30.1594	1.19416
miR-26b-5p | AD	9	35.1889	1.07512	46	29.9589	1.43706
miR-27a-3p | HC	32	34.8978	1.38631	38	28.7642	1.64897	MIMAT0000084	UUCACAGUGGCUAAGUUCCGC
miR-27a-3p | bvFTD	37	34.6397	1.32351	47	26.7538	0.929798
miR-27a-3p | AD	42	34.206	1.53157	46	26.7683	1.30364
miR-27b-3p | HC	43	33.0414	1.55075	38	28.4655	1.59438	MIMAT0000419	UUCACAGUGGCUAAGUUCUGC
miR-27b-3p | bvFTD	48	32.325	1.68911	47	26.663	0.956722
miR-27b-3p | AD	48	31.8477	1.68372	46	26.8033	1.92248
miR-29a-3p | HC	43	32.8095	1.57831	38	28.9168	1.33083	MIMAT0000086	UAGCACCAUCUGAAAUCGGUUA
miR-29a-3p | bvFTD	46	32.6128	1.37648	47	27.6091	0.950132
miR-29a-3p | AD	46	32.2874	1.65722	46	27.5178	0.985269
miR-29b-3p | HC	37	34.3943	1.43515	38	31.0932	1.73466	MIMAT0000100	UAGCACCAUUUGAAAUCAGUGUU
miR-29b-3p | bvFTD	45	34.2196	1.37752	47	29.2185	1.28024
miR-29b-3p | AD	44	34.1643	1.70591	46	28.6457	1.16877
miR-29c-3p | HC	44	32.7095	1.51142	38	28.3924	1.31041	MIMAT0000681	UAGCACCAUUUGAAAUCGGUUA
miR-29c-3p | bvFTD	47	32.4053	1.4749	47	27.263	0.907416
miR-29c-3p | AD	46	32.0409	1.51691	46	26.9826	0.848155
miR-301a-3p | HC	serum panel only			37	31.7486	1.56352	MIMAT0000688	CAGUGCAAUAGUAUUGUCAAAGC
miR-301a-3p | bvFTD				46	29.0293	0.752112
miR-301a-3p | AD				46	28.9217	1.40208
miR-30a-5p | HC	40	34.3373	1.03495	38	32.0421	1.04455	MIMAT0000087	UGUAAACAUCCUCGACUGGAAG
miR-30a-5p | bvFTD	45	34.1076	1.26295	47	31.0511	0.600023
miR-30a-5p | AD	46	33.2289	1.53186	46	30.9448	0.861992
miR-30b-5p | HC	43	33.7021	1.10043	38	28.7684	1.74496	MIMAT0000420	UGUAAACAUCCUACACUCAGCU
miR-30b-5p | bvFTD	47	33.0681	1.01161	47	26.3474	1.13885
miR-30b-5p | AD	47	32.687	0.889763	46	26.1017	1.4205
miR-30c-5p | HC	43	33.5763	0.984651	38	28.9784	1.60692	MIMAT0000244	UGUAAACAUCCUACACUCUCAGC
miR-30c-5p | bvFTD	48	33.1552	0.949692	47	27.2957	1.08517
miR-30c-5p | AD	48	32.7519	0.796588	46	27.2052	1.16395
miR-30d-5p | HC	42	33.9164	1.20936	38	27.9679	1.17061	MIMAT0000245	UGUAAACAUCCCCGACUGGAAG
miR-30d-5p | bvFTD	42	33.5812	1.08604	47	27.1036	0.572259
miR-30d-5p | AD	46	33.0611	1.54744	46	27.0726	0.932045
miR-30e-5p | HC	34	34.8326	1.0084	38	26.8042	1.43961	MIMAT0000692	UGUAAACAUCCUUGACUGGAAG
miR-30e-5p | bvFTD	44	34.5614	1.12433	47	25.4904	0.683498
miR-30e-5p | AD	48	33.6315	1.57926	46	25.4043	1.10408
miR-31-5p | HC	serum panel only			16	36.12	0.745117	MIMAT0000089	AGGCAAGAUGCUGGCAUAGCU
miR-31-5p | bvFTD				36	35.5472	0.932289
miR-31-5p | AD				31	35.6794	0.75044
miR-32-5p | HC	15	35.6013	1.02423	37	32.3646	1.55492	MIMAT0000090	UAUUGCACAUUACUAAGUUGCA
miR-32-5p | bvFTD	16	36.1288	0.7874	47	31.2264	1.05519
miR-32-5p | AD	11	35.61	1.67619	46	30.823	1.11154
miR-320a | HC	44	32.0875	0.93932	38	25.7434	0.916929	MIMAT0000510	AAAAGCUGGGUUGAGAGGGCGA
miR-320a | bvFTD	46	31.9552	1.28268	47	25.8815	0.639922
miR-320a | AD	48	31.605	1.28316	46	25.635	0.840087
miR-320b | HC	serum panel only			38	30.0197	1.36602	MIMAT0005792	AAAAGCUGGGUUGAGAGGGCAA
miR-320b | bvFTD				47	30.0179	0.909986
miR-320b | AD				46	29.9196	1.17262
miR-323a-3p | HC	4	31.3575	5.0332	28	34.7196	1.26867	MIMAT0000755	CACAUUACACGGUCGACCUCU
miR-323a-3p | bvFTD	11	32.6509	5.50822	42	33.8824	2.32241
miR-323a-3p | AD	9	36.2578	0.488871	37	33.9562	1.40152
miR-328-3p | HC	11	36.0964	0.823277	38	31.4018	1.476	MIMAT0000752	CUGGCCCUCUCUGCCCUUCCGU
miR-328-3p | bvFTD	18	35.8883	0.907558	47	29.9557	0.854964
miR-328-3p | AD	21	35.6395	1.17938	46	29.8726	1.24875
miR-335-5p | HC	35	35.5691	1.02143	37	32.3005	1.30531	MIMAT0000765	UCAAGAGCAAUAACGAAAAAUGU
miR-335-5p | bvFTD	39	35.5941	1.30463	47	31.6202	1.11702
miR-335-5p | AD	40	35.285	2.41259	46	31.3115	1.17767
miR-338-3p | HC	24	35.5112	1.15055	38	31.6903	1.59513	MIMAT0000763	UCCAGCAUCAGUGAUUUUGUUG
miR-338-3p | bvFTD	32	34.8891	1.37363	47	29.514	1.23456
miR-338-3p | AD	35	34.6146	1.6814	46	29.7061	1.45591
miR-342-3p | HC	35	35.106	1.08501	38	30.3274	1.62901	MIMAT0000753	UCUCACACAGAAAUCGCACCCGU
miR-342-3p | bvFTD	40	34.831	1.26102	47	28.7257	0.635014
miR-342-3p | AD	41	34.3634	1.44984	46	28.8624	0.875375
miR-34a-5p | HC	44	33.618	1.40836	37	32.8265	1.49333	MIMAT0000255	UGGCAGUGUCUUAGCUGGUUGU
miR-34a-5p | bvFTD	44	33.0916	1.18294	46	31.1748	0.913206
miR-34a-5p | AD	47	33.0198	1.375	46	31.2498	1.28041
miR-370-3p | HC	serum panel only			27	34.6685	3.89203	MIMAT0000722	GCCUGCUGGGGUGGAACCUGGU
miR-370-3p | bvFTD				37	34.1186	1.31695
miR-370-3p | AD				36	33.9108	1.48181
miR-378a-3p | HC	37	34.8824	1.19961	CSF panel only			MIMAT0000732	ACUGGACUUGGAGUCAGAAGGC
miR-378a-3p | bvFTD	42	34.7045	1.45344
miR-378a-3p | AD	42	34.6148	1.34549
miR-424-5p | HC	27	35.8137	0.951267	27	34.8252	1.40804	MIMAT0001341	CAGCAGCAAUUCAUGUUUUGAA
miR-424-5p | bvFTD	20	35.624	1.2459	39	34.19	1.46096
miR-424-5p | AD	30	35.6293	1.32128	37	34.0973	1.94958
miR-425-5p | HC	23	34.5917	1.57012	38	29.8766	1.50453	MIMAT0003393	AAUGACACGAUCACUCCCGUUGA
miR-425-5p | bvFTD	28	34.9536	1.23284	47	28.8249	0.900888
miR-425-5p | AD	26	34.8969	1.84463	46	28.7578	1.20555
miR-4449 | HC	5	25.128	2.07503	CSF panel only			MIMAT0018968	CGUCCCGGGGCUGCGCGAGGCA
miR-4449 | bvFTD	10	27.132	4.06756
miR-4449 | AD	13	26.7377	6.21893
miR-4674 | HC	26	36.2788	0.608318	CSF panel only			MIMAT0019756	CUGGGCUCGGGACGCGCGGCU
miR-4674 | bvFTD	25	35.9584	0.576416
miR-4674 | AD	30	35.7603	0.768031
miR-451a | HC	serum panel only			38	20.9634	1.67837	MIMAT0001631	AAACCGUUACCAUUACUGAGUU
miR-451a | bvFTD				47	19.5679	1.03609
miR-451a | AD				46	19.1087	1.13597
miR-483-3p | HC	serum panel only			26	35.2619	0.791293	MIMAT0002173	UCACUCCUCUCCUCCCGUCUU
miR-483-3p | bvFTD				46	34.03	0.975429
miR-483-3p | AD				45	33.726	1.1727
miR-491-5p | HC	serum panel only			33	34.413	1.39148	MIMAT0002807	AGUGGGGAACCCUUCCAUGAGG
miR-491-5p | bvFTD				47	32.0919	0.8239
miR-491-5p | AD				45	32.2887	1.29485
miR-532-5p | HC	15	35.8053	0.862926	38	31.3729	1.49167	MIMAT0002888	CAUGCCUUGAGUGUAGGACCGU
miR-532-5p | bvFTD	26	35.7092	0.897552	47	29.9132	0.597095
miR-532-5p | AD	34	35.3594	1.11769	46	29.7711	0.974384
miR-545-3p | HC	serum panel only			19	34.9753	1.18727	MIMAT0003165	UCAGCAAACAUUUAUUGUGUGC
miR-545-3p | bvFTD				39	34.6262	1.08851
miR-545-3p | AD				43	34.036	0.951062
miR-572 | HC	2	36.01	0.537401	CSF panel only			MIMAT0003237	GUCCGCUCGGCGGUGGCCCA
miR-572 | bvFTD	1	35.05	na
miR-572 | AD	0	na	na
miR-590-5p | HC	27	34.8463	3.32049	38	29.7134	1.40232	MIMAT0003258	GAGCUUAUUCAUAAAAGUGCAG
miR-590-5p | bvFTD	27	35.73	0.945284	47	28.7672	0.909151
miR-590-5p | AD	30	35.0433	1.72373	46	28.6807	1.01708
miR-645 | HC	0	na	na	CSF panel only			MIMAT0003315	UCUAGGCUGGUACUGCUGA
miR-645 | bvFTD	0	na	na
miR-645 | AD	0	na	na
miR-652-3p | HC	22	34.7945	1.95244	38	29.4926	1.36512	MIMAT0003322	AAUGGCGCCACUAGGGUUGUG
miR-652-3p | bvFTD	34	34.8847	1.60131	47	27.8134	0.895188
miR-652-3p | AD	29	35.0941	1.46406	46	27.6557	1.19572
miR-663a | HC	serum panel only			31	34.8758	1.11962	MIMAT0003326	AGGCGGGGCGCCGCGGGACCGC
miR-663a | bvFTD				47	34.3111	1.07639
miR-663a | AD				44	34.7361	1.25026
miR-885-5p | HC	serum panel only			35	33.7611	1.26794	MIMAT0004947	UCCAUUACACUACCCUGCCUCU
miR-885-5p | bvFTD				47	32.4026	1.00263
miR-885-5p | AD				45	32.4858	1.25627
miR-9-3p | HC	43	33.7274	0.780976	20	35.523	1.09487	MIMAT0000442	AUAAAGCUAGAUAACCGAAAGU
miR-9-3p | bvFTD	46	33.0757	0.74131	26	36.0308	0.7891
miR-9-3p | AD	46	32.7843	0.892658	36	34.9769	3.52609
miR-9-5p | HC	10	36.283	0.525083	7	32.5014	6.32699	MIMAT0000441	UCUUUGGUUAUCUAGCUGUAUGA
miR-9-5p | bvFTD	18	36.0989	0.63884	9	36.2278	0.702936
miR-9-5p | AD	19	36.3732	0.385199	16	35.9838	1.27297
miR-92a-3p | HC	44	33.227	1.6762	37	24.6597	1.08196	MIMAT0000092	UAUUGCACUUGUCCCGGCCUGU
miR-92a-3p | bvFTD	46	32.7728	1.36595	47	24.244	0.570315
miR-92a-3p | AD	48	32.6004	1.80612	45	23.9147	0.860247
miR-92b-3p | HC	22	36.1191	0.68653	CSF panel only			MIMAT0003218	UAUUGCACUCGUCCCGGCCUCC
miR-92b-3p | bvFTD	38	35.5361	0.79916
miR-92b-3p | AD	36	35.4683	0.855047
miR-93-5p | HC	28	35.0061	1.69017	38	26.9918	1.548	MIMAT0000093	CAAAGUGCUGUUCGUGCAGGUAG
miR-93-5p | bvFTD	38	34.8739	1.50436	47	25.313	0.624893
miR-93-5p | AD	39	34.1362	3.11623	46	25.0496	1.20165
miR-98-5p | HC	serum panel only			33	33.8176	1.40192	MIMAT0000096	UGAGGUAGUAAGUUGUAUUGUU
miR-98-5p | bvFTD				47	32.3628	1.2802
miR-98-5p | AD				46	32.3383	1.5968
miR-99a-5p | HC	44	31.195	1.1709	38	31.1213	1.19122	MIMAT0000097	AACCCGUAGAUCCGAUCUUGUG
miR-99a-5p | bvFTD	48	30.8252	1.3195	47	30.4613	0.77503
miR-99a-5p | AD	47	30.51	1.36562	46	30.1741	0.83496
miR-99b-5p | HC	40	35.0935	1.07001	38	31.7095	1.15182	MIMAT0000689	CACCCGUAGAACCGACCUUGCG
miR-99b-5p | bvFTD	44	34.3159	1.19896	47	30.6911	0.919785
miR-99b-5p | AD	45	33.8164	1.12506	46	30.6254	1.04088
