# Supplementary material for: Specific serum and CSF microRNA profiles distinguish sporadic behavioural variant of frontotemporal dementia compared with Alzheimer patients and cognitively healthy controls
Source: PLoS One. 2018 May 10;13(5):e0197329. doi: 10.1371/journal.pone.0197329 (PMC5945001; doi:10.1371/journal.pone.0197329)
Supplement: S7 Table — Listed are miRNAs that displayed significantly different expression levels in either serum or CSF samples between cognitively healthy control, bvFTD and AD cases. Fold change is calculated as ddCt = dCtCtRef −CtmiRNA − dCtCtRef −CtmiRNA where larger values reflect higher abundance. AD = Alzheimer’s disease, bvFTD = behavioural variant frontotemporal dementia, HC = cognitively healthy controls, p = p-value. (XLSX) [file pone.0197329.s012.xlsx]

## Sheet: S7 Table
miRNA	AD vs. HC		bvFTD vs. HC		bvFTD vs AD		factor analysis	panel
	ddCt	p	ddCt	p	ddCt	p
miR-103a-3p	0.7652	<0.001						serum
miR-142-3p	0.6371	<0.001						serum
miR-20a-5p	0.8255	<0.001					Factor 1	serum
miR-29b-3p	1.003	<0.001					Factor 1	serum
miR-132-3p	-0.6335	<0.001						serum
miR-143-3p			0.6661	0.002				serum
miR-197-3p			0.9964	<0.001				serum
miR-27a-3p			0.6499	<0.001			Factor 1	serum
miR-338-3p			0.8157	<0.001				serum
miR-491-5p			0.8544	<0.001				serum
miR-100-5p			-0.7771	<0.001				serum
miR-335-5p			-0.5951	<0.001				serum
miR-99a-5p			-0.7005	<0.001				serum
let-7b-5p	0.623	0.04	0.5878	0.04				serum
let-7g-5p	0.9891	<0.001	0.7253	<0.001			Factor 1	serum
miR-106a-5p	0.8947	<0.001	0.6197	<0.001			Factor 1	serum
miR-106b-5p	1.096	<0.001	0.7249	<0.001			Factor 1	serum
miR-18b-5p	1.19	<0.001	0.9038	<0.001			Factor 1	serum
miR-223-3p	1.19	<0.001	1.71	<0.001				serum
miR-26a-5p	0.9657	<0.001	0.8607	<0.001				serum
miR-26b-5p	1.828	<0.001	1.712	<0.001			Factor 1	serum
miR-301a-3p	1.441	<0.001	1.386	<0.001			Factor 1	serum
miR-30b-5p	1.222	<0.001	1.06	<0.001			Factor 1	serum
miR-146a-5p	-0.913	<0.001	-0.914	<0.001			Factor 1	serum
miR-15a-5p	-0.6385	<0.001	-0.8517	<0.001				serum
miR-22-3p	-1.257	<0.001	-1.492	<0.001			Factor 3	serum
miR-320a	-1.337	<0.001	-1.499	<0.001			Factor 1	serum
miR-320b	-1.345	<0.001	-1.359	<0.001			Factor 1	serum
miR-92a-3p	-0.7126	<0.001	-0.9596	<0.001				serum
miR-1246	-1.456	<0.001	-0.8705	0.001	0.5854	0.02	Factor 1	serum
miR-24-3p	0.71	<0.001						CSF
miR-99b-5p	0.83	<0.001						CSF
miR-124-3p	0.7	0.008	0.76	0.006				CSF
miR-125a-5p	1.06	<0.001	0.78	<0.001				CSF
miR-223-3p	1	<0.001	0.6	0.036				CSF
miR-15a-5p	-0.73	0.011	-0.65	0.014				CSF
miR-140-3p	0.78	0.003			-0.84	0.002		CSF
miR-30a-5p	0.74	<0.001			-0.68	<0.001		CSF
miR-30e-5p	0.95	<0.001			-0.79	<0.001		CSF
miR-22-3p					-0.8	<0.001		CSF
